# Supplementary material for: Selective inhibition of cancer cell self-renewal through a Quisinostat-histone H1.0 axis
Source: PubMed Central journal article supplement (PMC7156485; doi:10.1038/s41467-020-15615-z), 2020-04-14
Supplement: 41467_2020_15615_MOESM2_ESM.pdf [file 41467_2020_15615_MOESM2_ESM.pdf]

## **DESCRIPTION OF ADDITIONAL SUPPLEMENTARY ITEMS**

File Name: Supplementary Data 1

Description: Compound screen

File Name: Supplementary Data 2

Description: Primary and validated hits

File Name: Supplementary Data 3

Description: HDAC inhibitors targets
